# Supplementary material
Source: PubMed Central journal article supplement (PMC2818198)
Supplement: supp_123_4_619__1.pdf [file supp_123_4_619__1.pdf]

## Supplementary Fig. 1

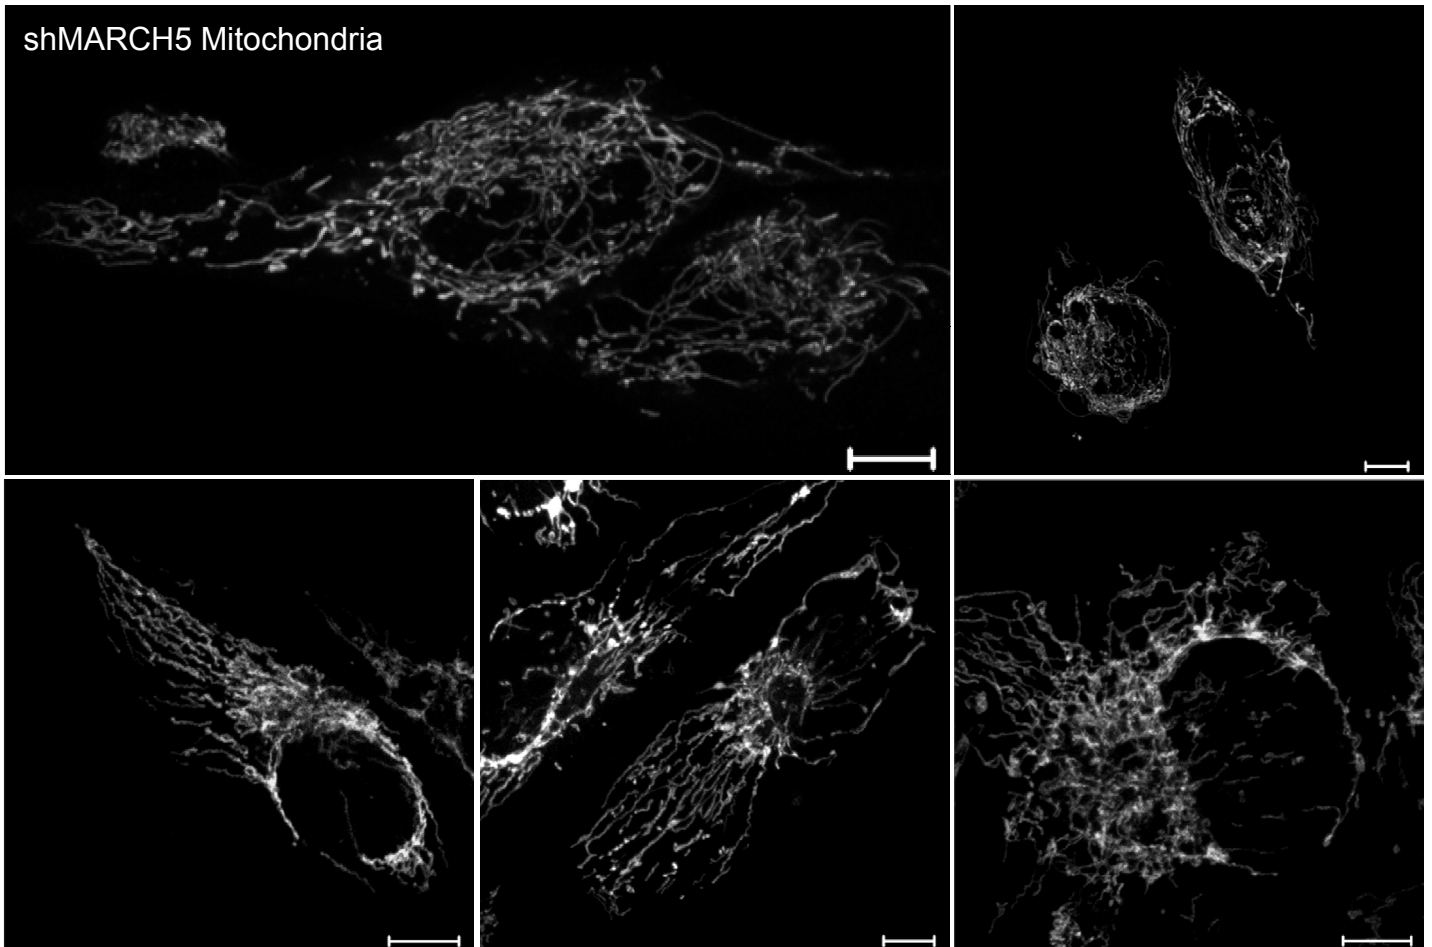

### **Knockdown of MARCH5 expression induces mitochondrial elongation.**

HeLa cells were transfected with shMARCH5 vector targeting for degradation of MARCH5 mRNA. Mitochondrial morphology was visualized after staining with MitoTracker Red and images were captured under confocal microscopy. Scale bars represent 10  $\mu\text{m}$ .
