# Supplementary material
Source: PubMed Central journal article supplement (PMC2818198)
Supplement: supp_123_4_619__5.pdf [file supp_123_4_619__5.pdf]

## Supplementary Fig. 4B

B

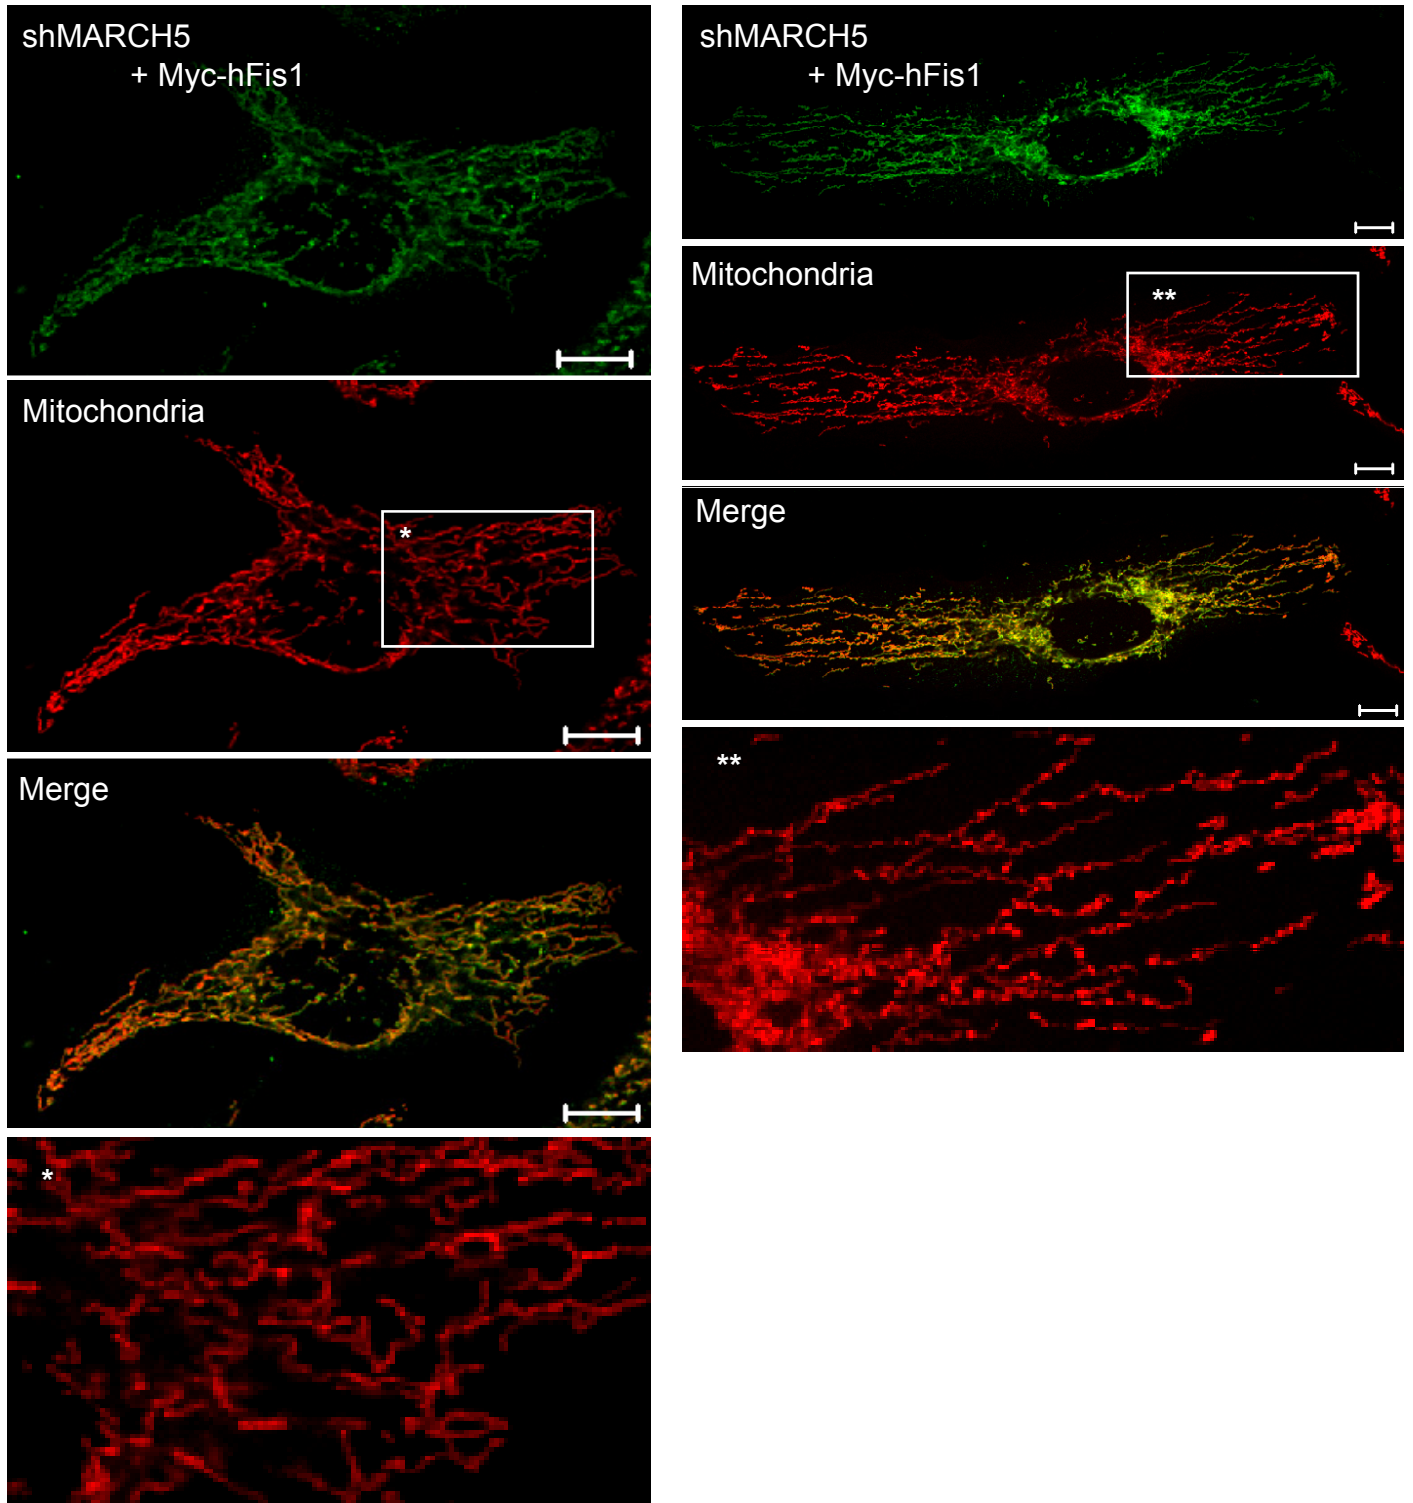

**Ectopic expressions of Drp1 reverts mitochondrial morphology in MARCH5 depleted cells.**

HA-Drp1 and HA-Drp1<sup>K38A</sup> (A) and Myc-hFis1 (B) were introduced into the MARCH5 depleted cells on day 2. After two days, mitochondria were analyzed by confocal microscopy after staining with MitoTracker Red. Scale bars represent 10 μm.
