# Supplementary material
Source: PubMed Central journal article supplement (PMC2818198)

## Supplementary Fig. 4A

A

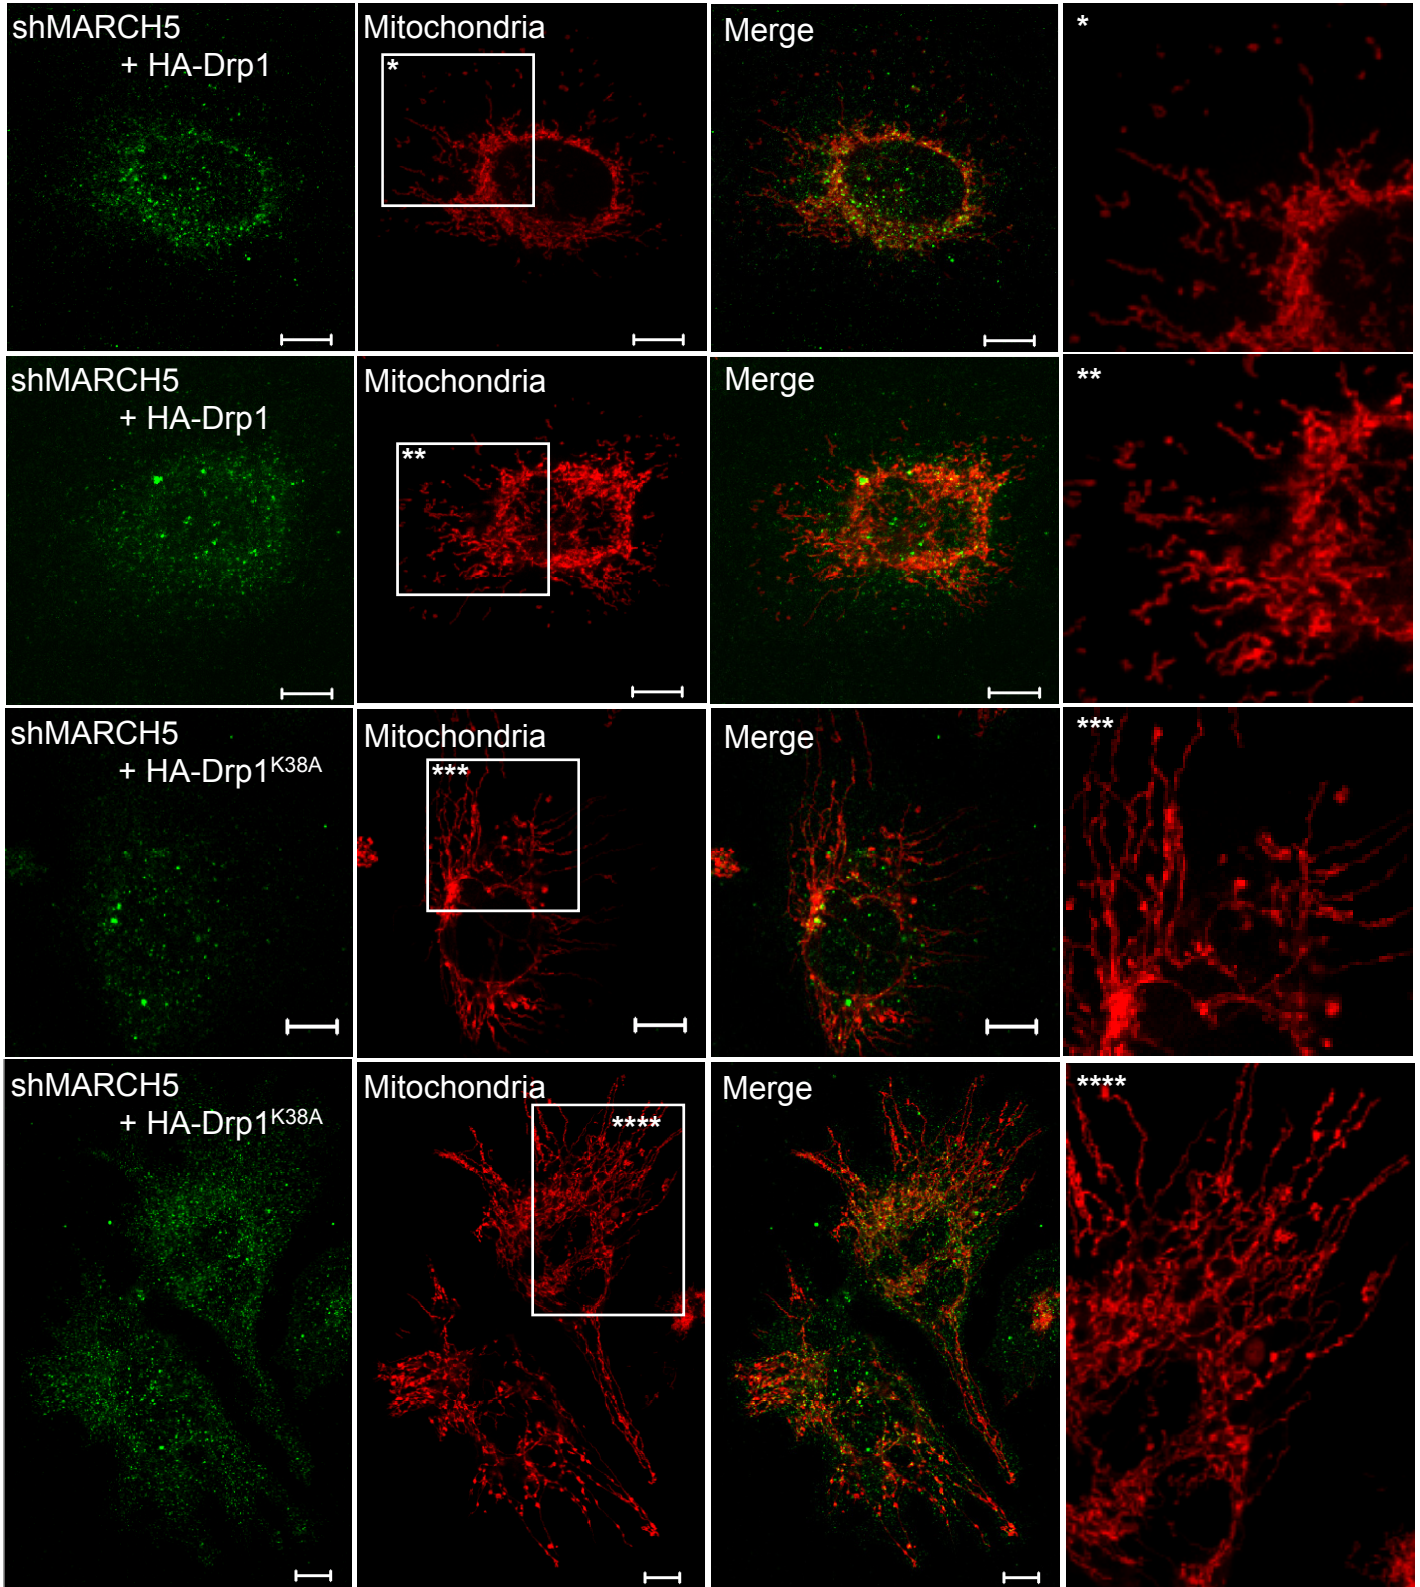

Supplement: supp_123_4_619__4.pdf [file supp_123_4_619__4.pdf]
